# Supplementary material for: Optimisation of an Automated DNA Extraction Method for Bone and Teeth Samples and Applicability to Two Forensic Cases
Source: MDPI journal article supplement (doi:10.3390/forensicsci1030017), 2021-11-15
Supplement: s1 [file s1]

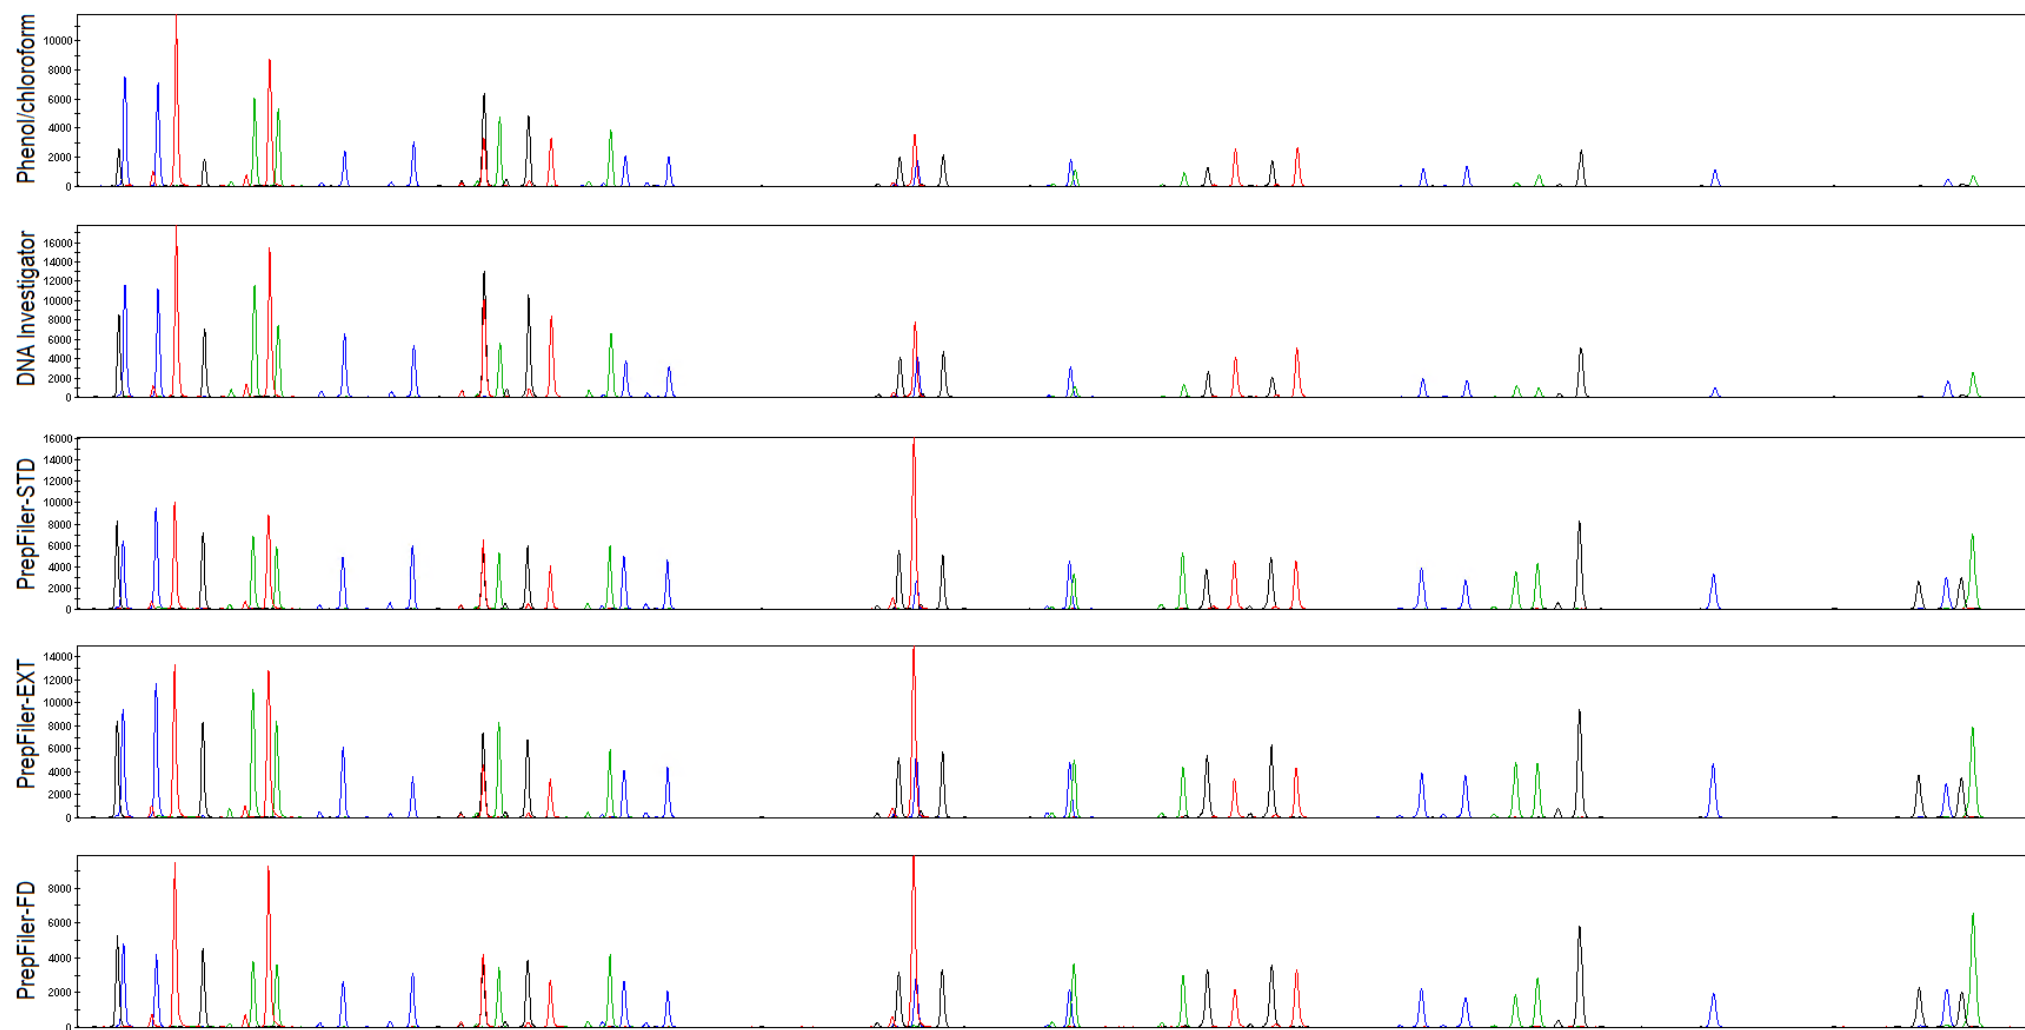

**Supplementary Figure S1:** Electropherograms of representative PowerPlex 21 profiles generated from a tooth sample extracted using (from top to bottom): Phenol/chloroform, DNA Investigator and three variations of the PrepFiler BTA method; standard incubation (PrepFiler-STD), extended incubation (PrepFiler-EXT) and full demineralisation (PrepFiler-FD). Ski-slopes and drop out of larger loci were observed with the Phenol/chloroform and DNA Investigator methods, but not the PrepFiler BTA methods.
